# Supplementary material
Source: PubMed Central journal article supplement (PMC9401536)
Supplement: 10780432ccr210205-sup-258980_2_supp_7085339_qsgxgn.pdf [file 10780432ccr210205-sup-258980_2_supp_7085339_qsgxgn.pdf]

Immune Score    p53 score    Hedegaard  
■ low     WT    ■ H1  
■ medium     mutant    ■ H2  
■ high     NA    ■ H3  
 NA

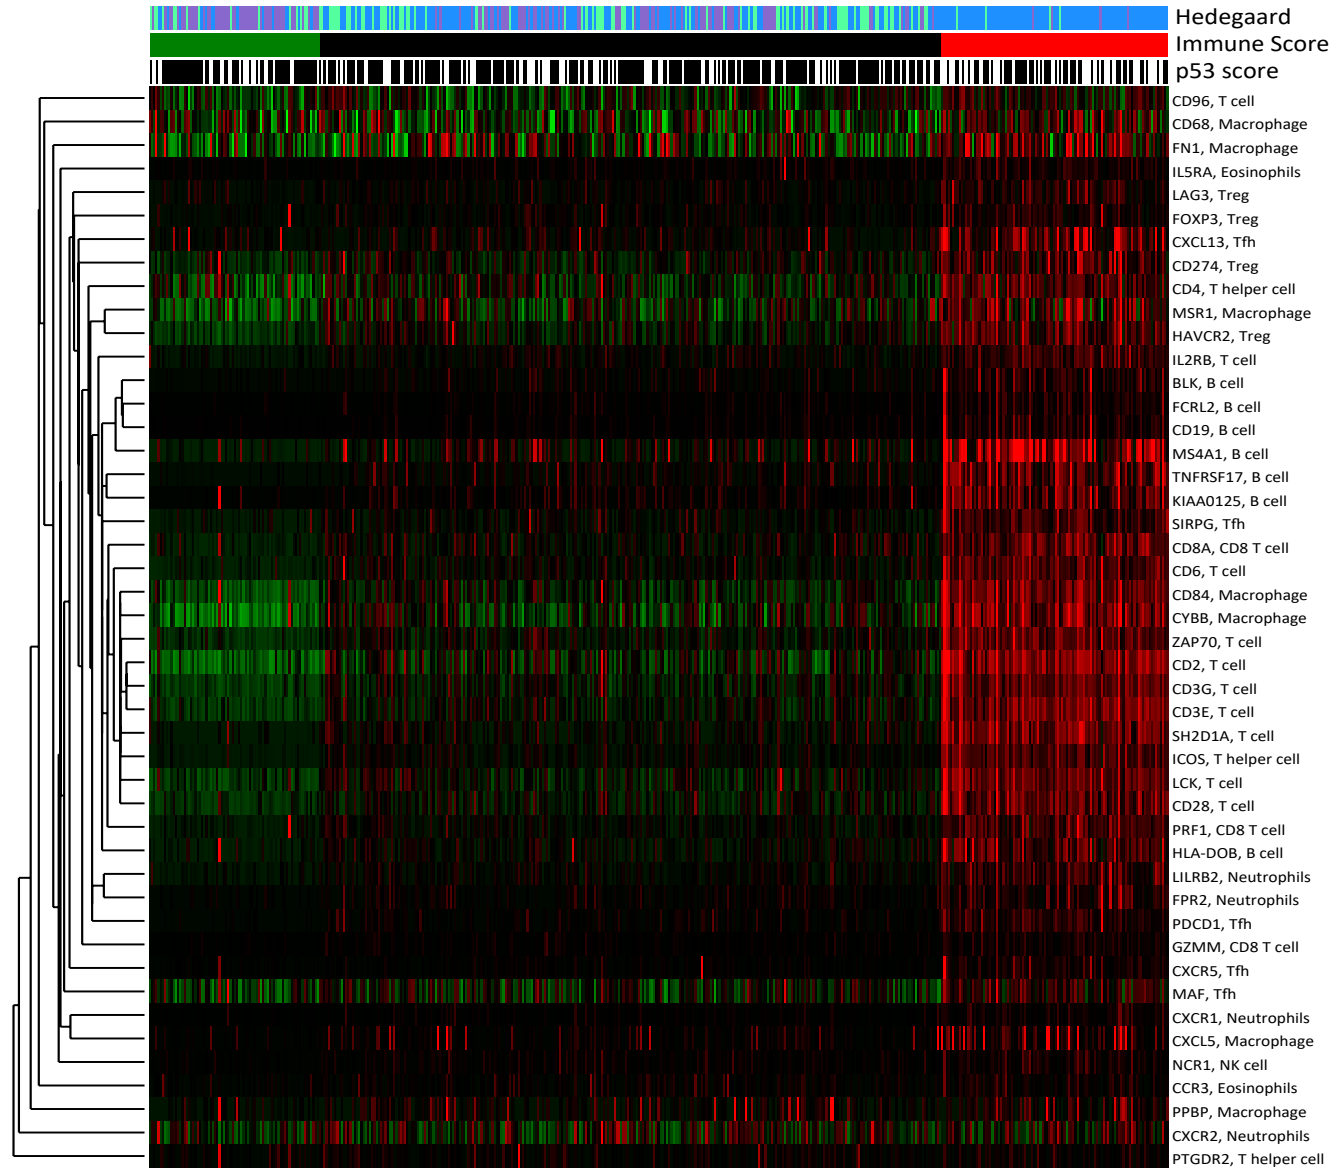

**Supplemental Figure 5: immune score using the publicly available UROMOL cohort**
