# Supplementary material
Source: PubMed Central journal article supplement (PMC9401536)
Supplement: 10780432ccr210205-sup-258980_2_supp_7085340_qsrxrn.pdf [file 10780432ccr210205-sup-258980_2_supp_7085340_qsrxrn.pdf]

Northwestern Validation Cohort – RFS

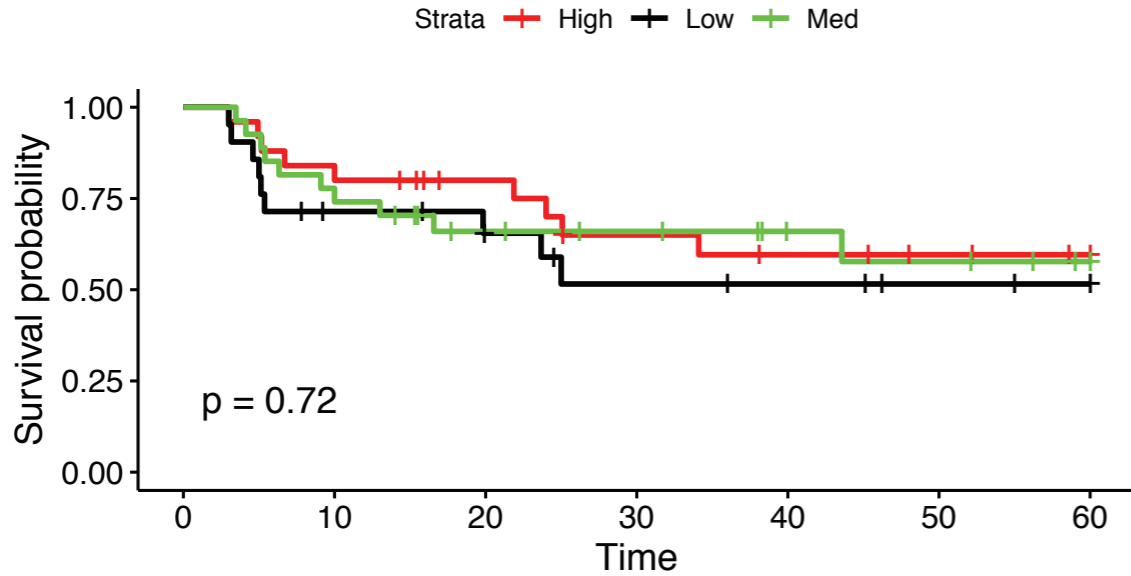

Northwestern Cohort (High/Med vs Low) – RFS

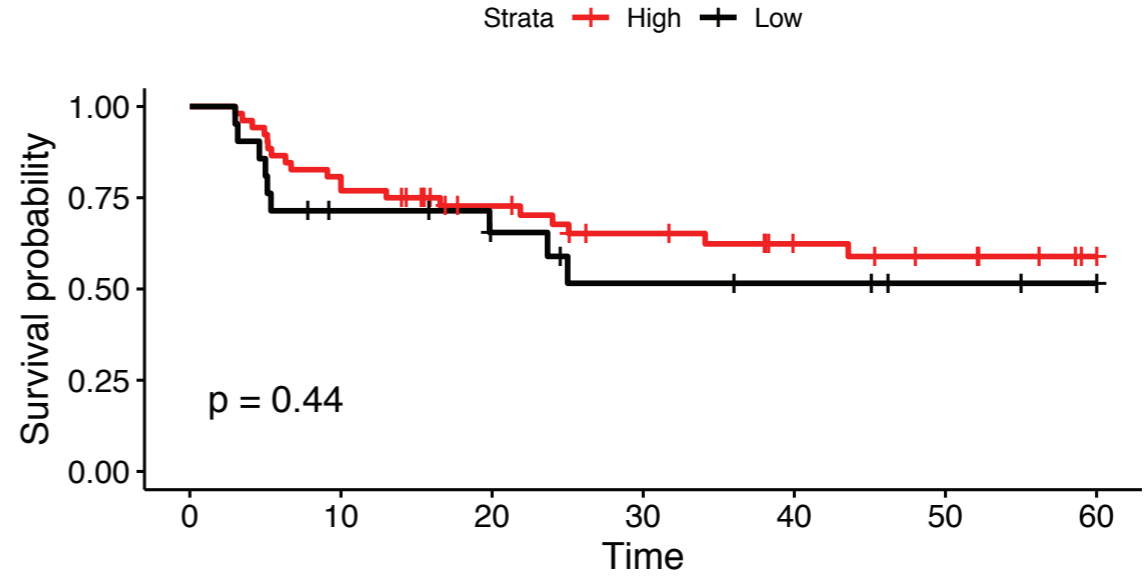

Validation Cohort – recurrence

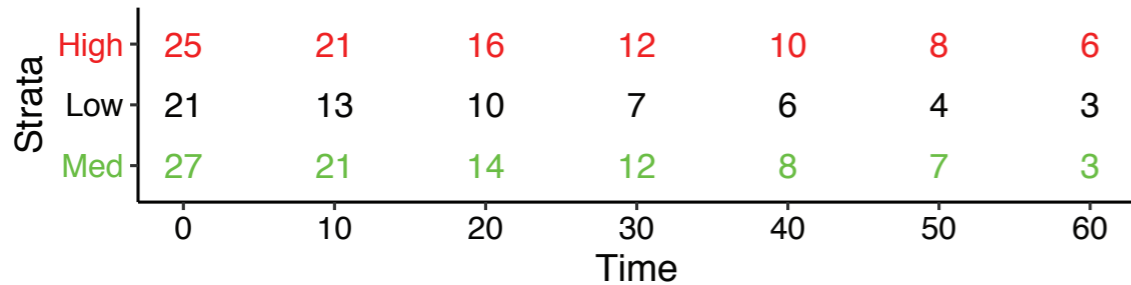

Validation Cohort (High/Med vs Low) – recurrence

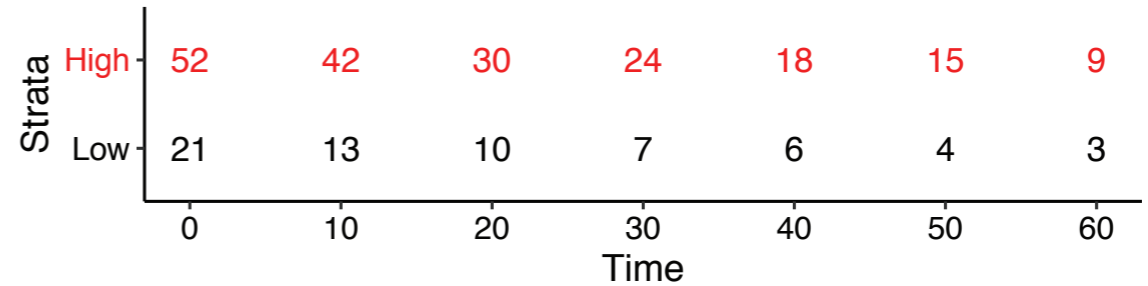

**Supplemental Figure 6. Recurrence Free Survival in the Northwestern HGT1 cohort by immune score stratified by (1) High, Medium, Low; (2) High/Medium vs. Low**
