# Supplementary material
Source: PubMed Central journal article supplement (PMC9401536)
Supplement: 10780432ccr210205-sup-258980_2_supp_7085341_qscxcn.pdf [file 10780432ccr210205-sup-258980_2_supp_7085341_qscxcn.pdf]

# MSK

# UROMOL

# Northwestern

## PDL1

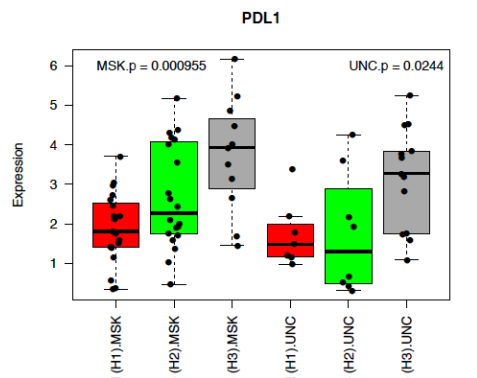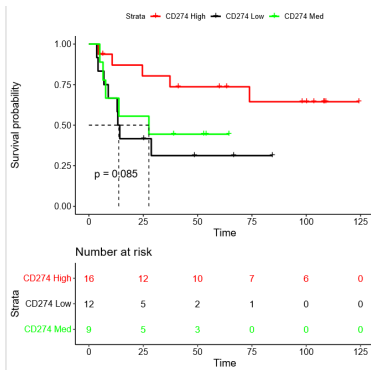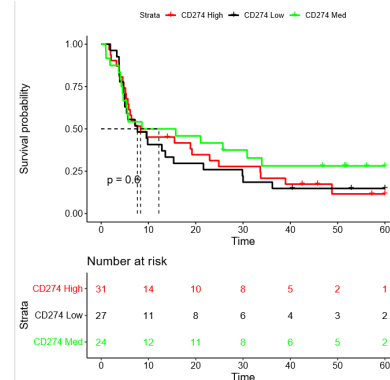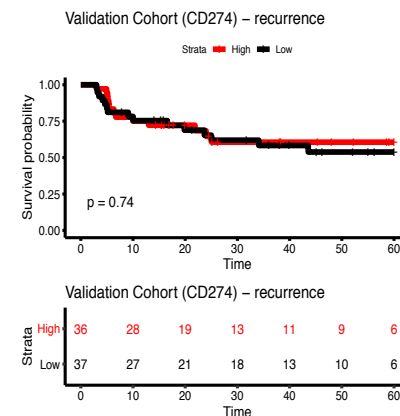

## PD1

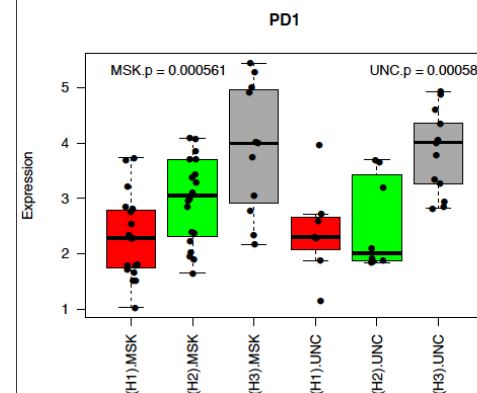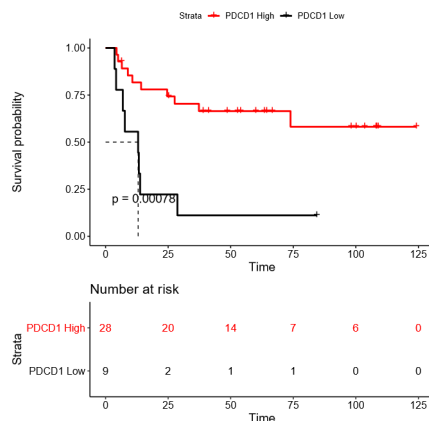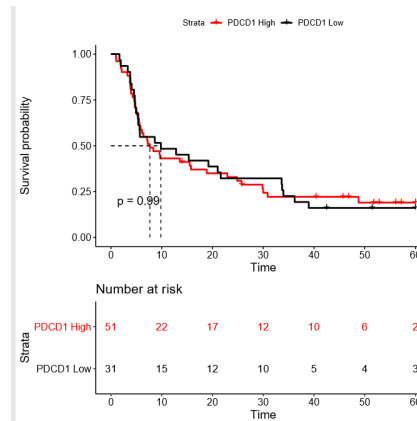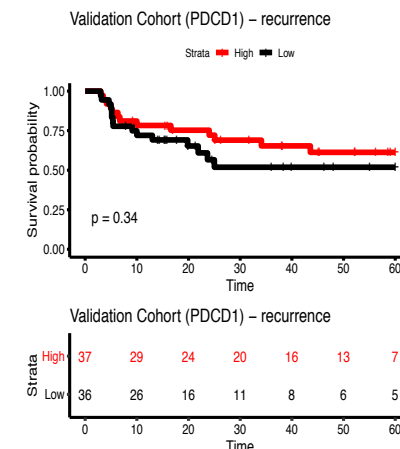

## CTLA4

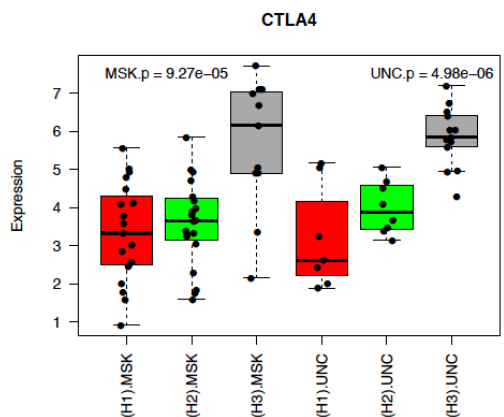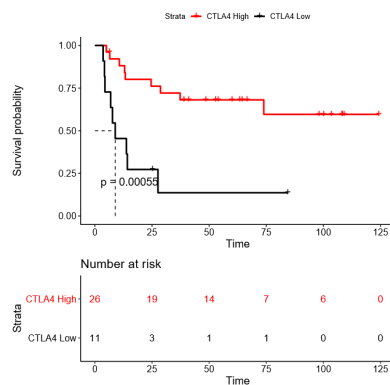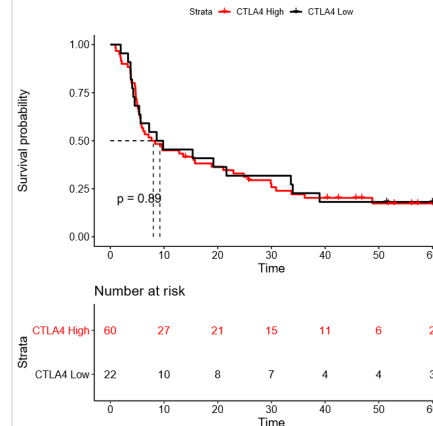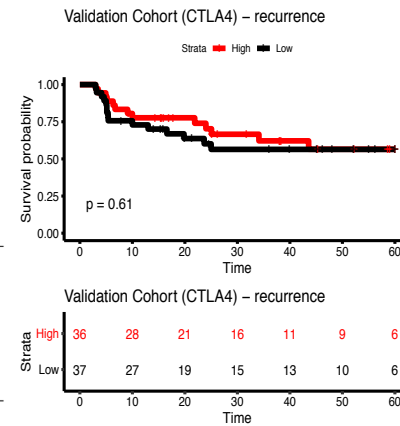

### Supplemental Figure 7:

**PDL1 (CD274) Expression: by UROMOL Subclasses in MSK and UNC cohorts and RFS (by high, medium, low tertiles) in MSK, UROMOL, & NW Cohorts**

**PD1 (PDCD1) Expression: by UROMOL Subclasses in MSK and UNC cohorts and RFS in MSK, UROMOL, & NW Cohorts**

**CTLA4 Expression: by UROMOL Subclasses in MSK and UNC cohorts and RFS in MSK, UROMOL, & NW Cohorts**
