# Supplementary material
Source: PubMed Central journal article supplement (PMC9401536)
Supplement: 10780432ccr210205-sup-258980_2_supp_7085342_qs4x4n.pdf [file 10780432ccr210205-sup-258980_2_supp_7085342_qs4x4n.pdf]

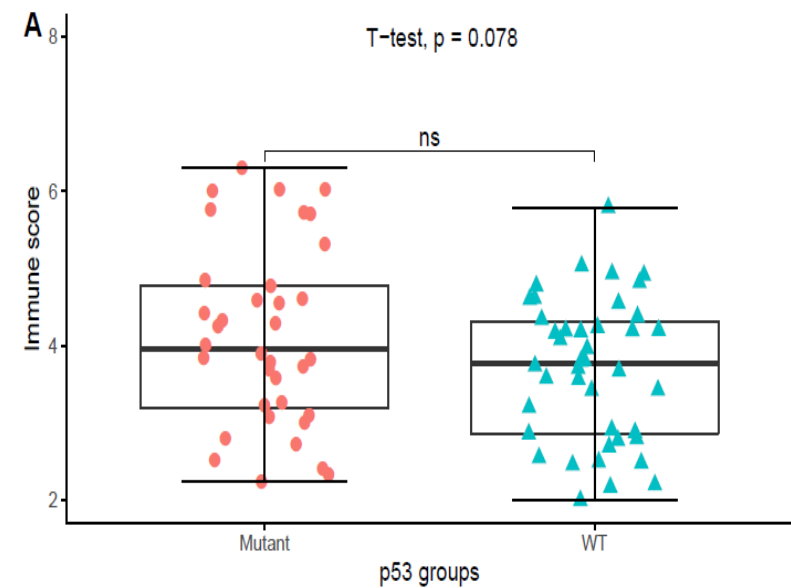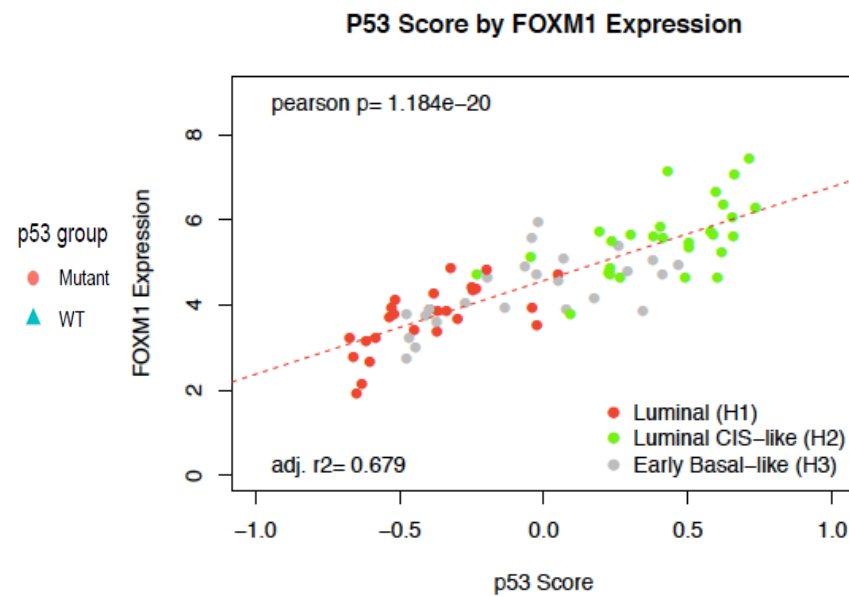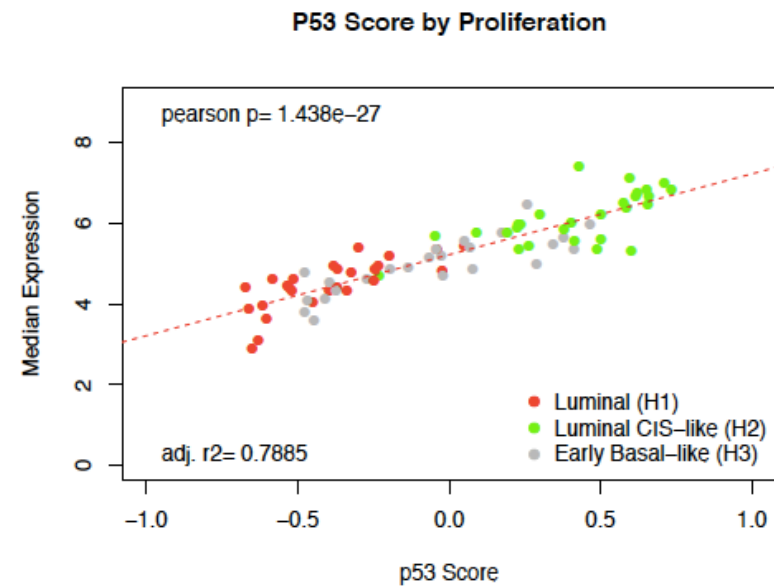

**Supplemental Figure 11: Correlation between P53 Score by immune score, FOXM1 expression, Proliferation**
