# Supplementary material
Source: PubMed Central journal article supplement (PMC9401536)
Supplement: 10780432ccr210205-sup-258980_2_supp_7144610_qtp09k.pdf [file 10780432ccr210205-sup-258980_2_supp_7144610_qtp09k.pdf]

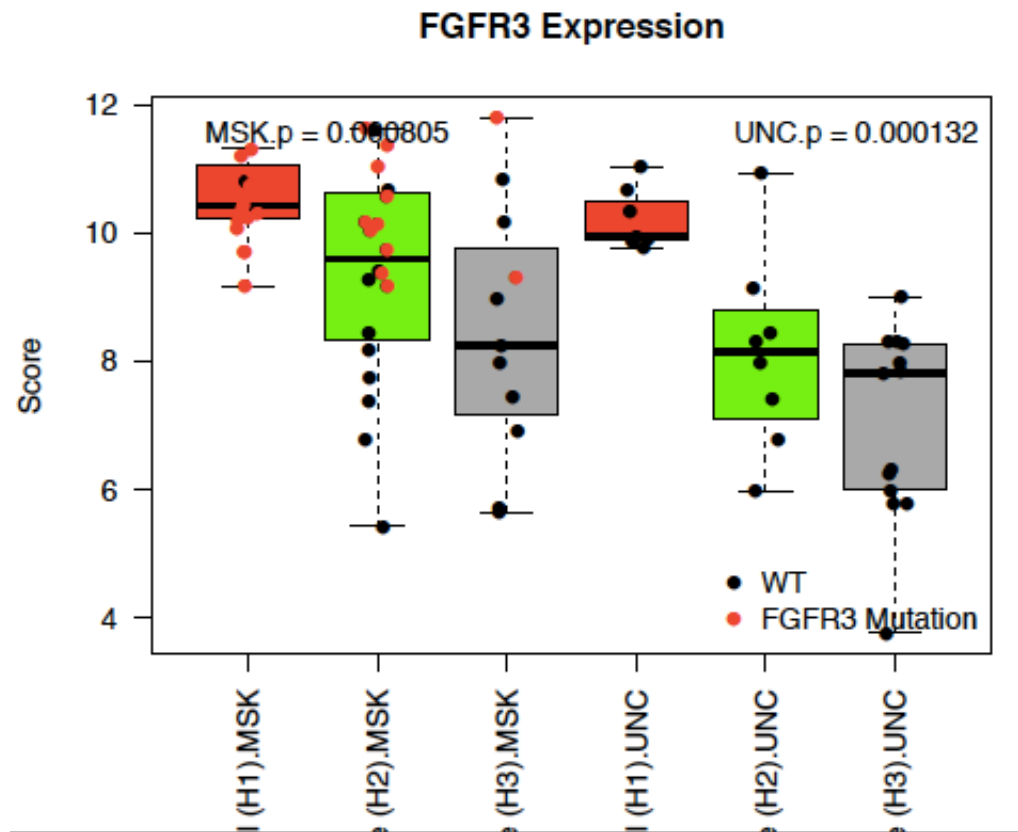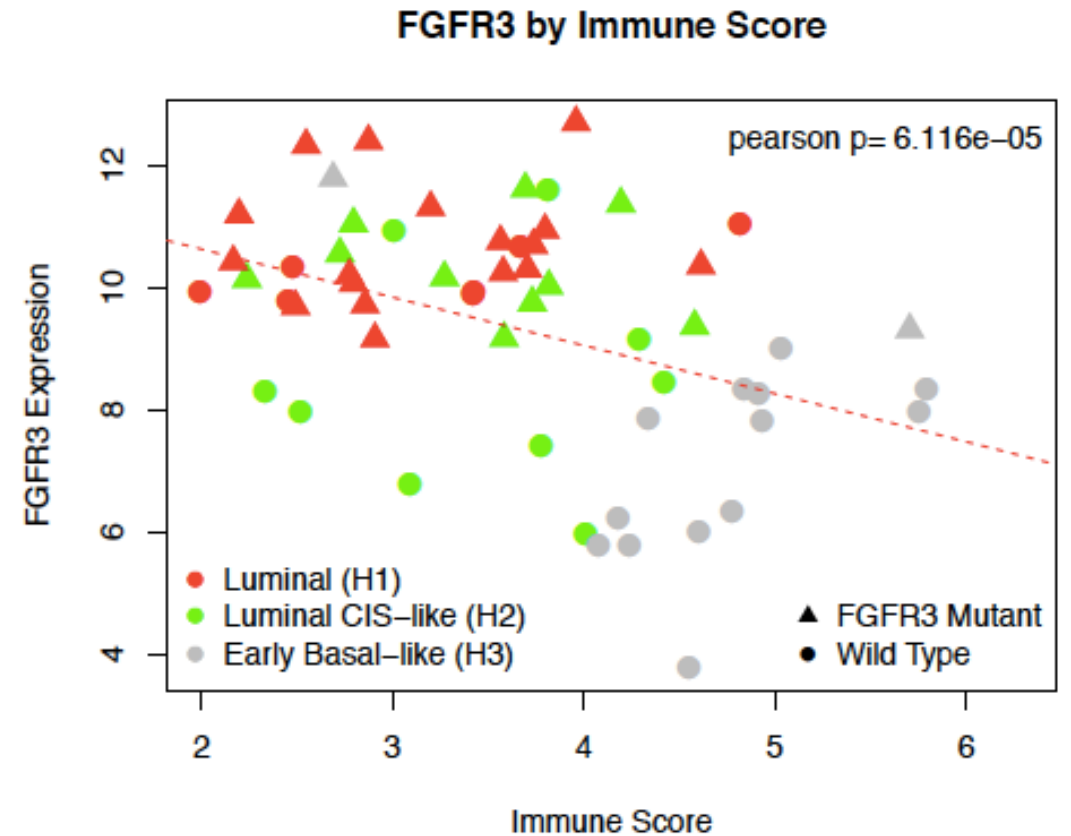

Supplemental Figure 2A: *FGFR3 Expression by UROMOL Subclasses in MSK and UNC cohorts*

Supplemental Figure 2B: *Inverse Relationship between FGFR3 expression and mutation with Immune Signature Score*
