# Supplementary material
Source: PubMed Central journal article supplement (PMC9401536)

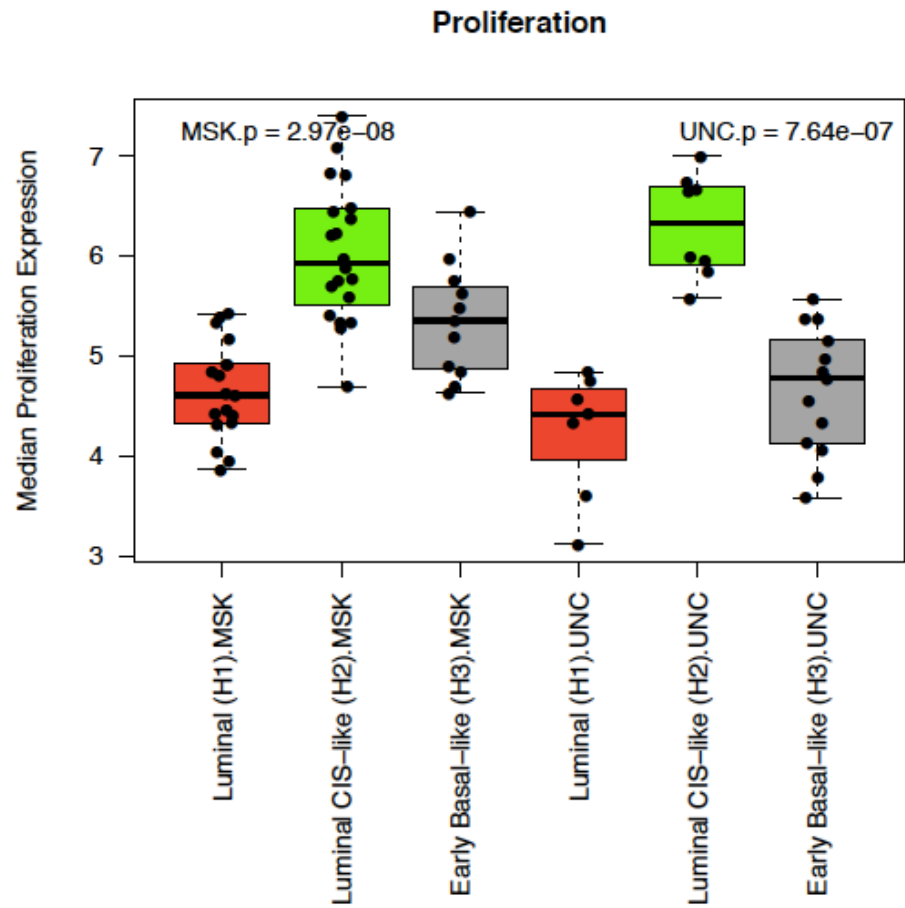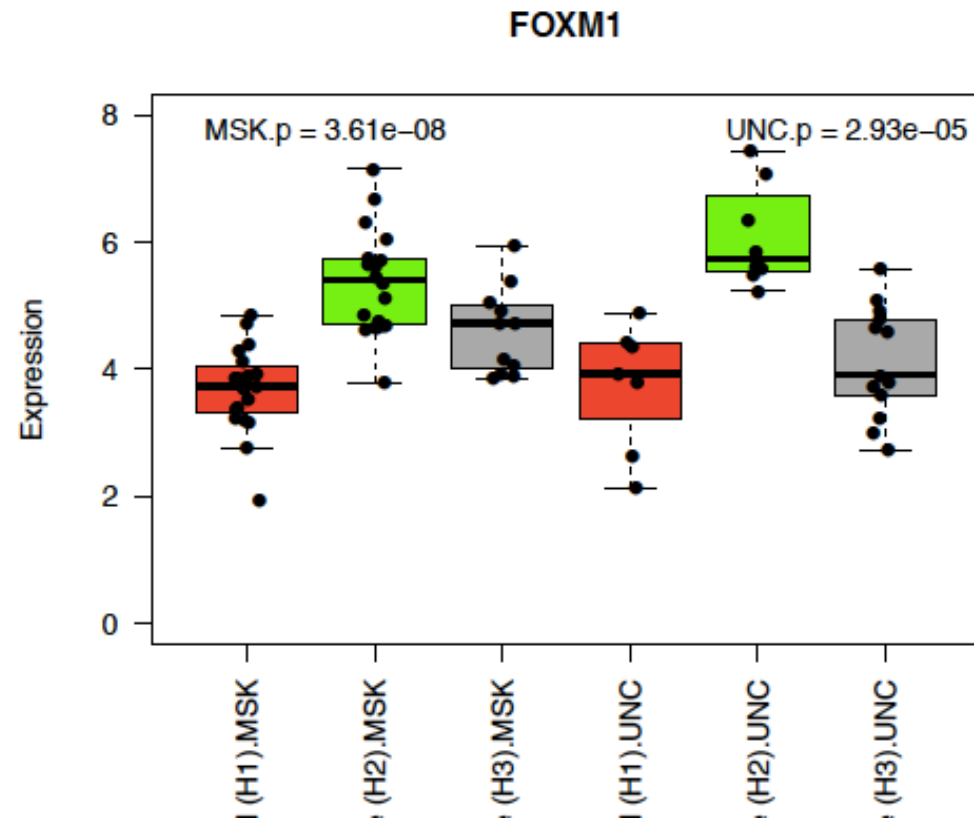

Supplemental Figure 3: Bar graphs “Proliferation” & “FOXM1”

Supplement: 10780432ccr210205-sup-258980_2_supp_7085337_qs2x2n.pdf [file 10780432ccr210205-sup-258980_2_supp_7085337_qs2x2n.pdf]

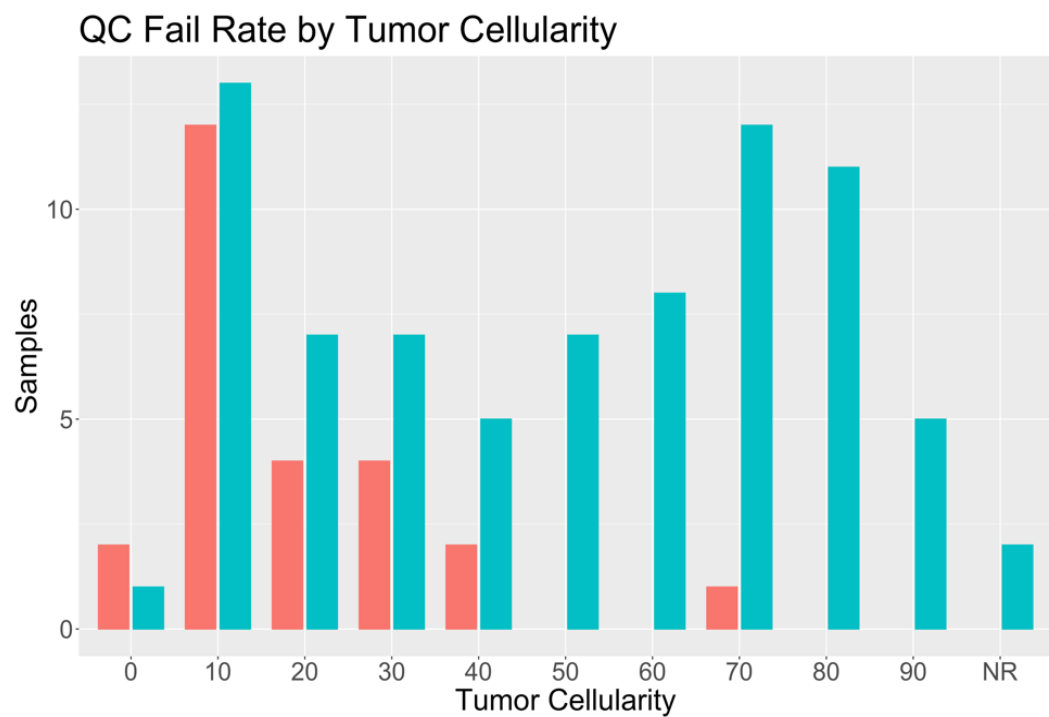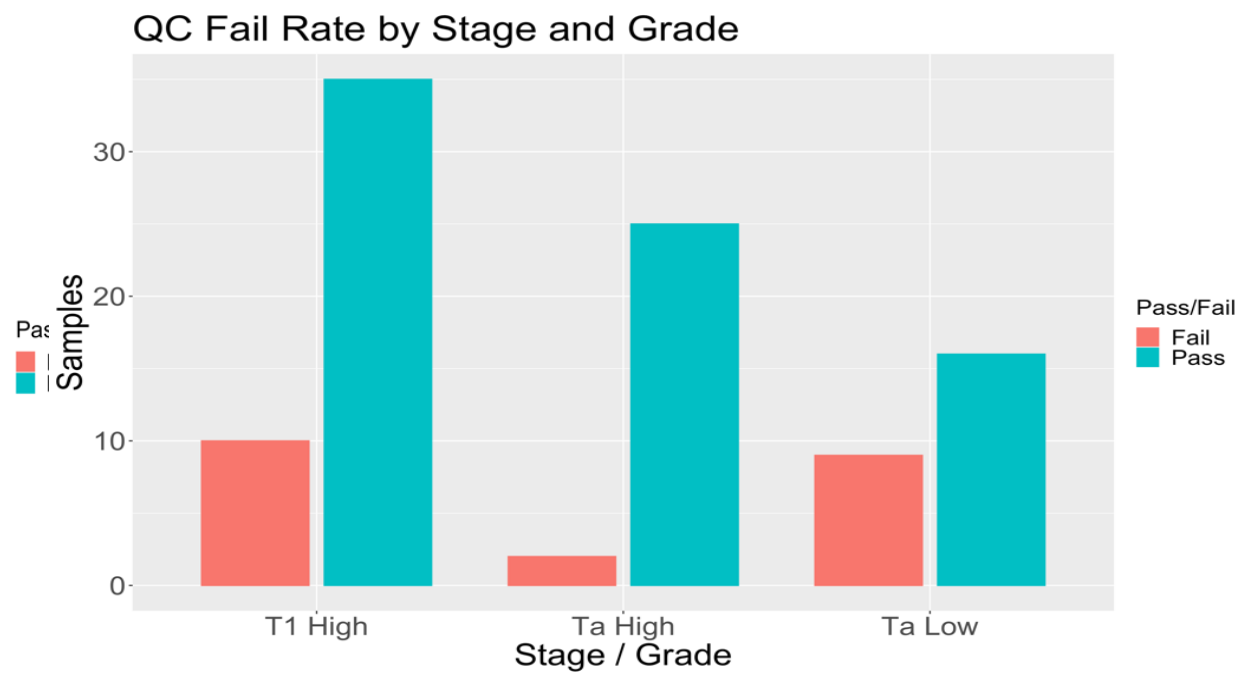

Supplemental Figure 1. QC Fail Rate by Tumor Cellularity, Stage and Grade

Supplement: 10780432ccr210205-sup-258980_2_supp_7144611_qtp09k.pdf [file 10780432ccr210205-sup-258980_2_supp_7144611_qtp09k.pdf]
